# Supplementary material
Source: publisher site journal article supplement (https://www.dovepress.com/article/280006)
Supplement: Supplementary file 1 [file get_supplementary_file.php]

**SUPPLEMENTAL MATERIAL**

**Supplemental Table 1.** List of signs and symptoms related to LAST

| **Category** | **Sign or symptom** |
| --- | --- |
| CNS excitement | Acute onset change in mental state |
| CNS excitement | Agitation |
| CNS excitement | Anxiety |
| CNS excitement | Auditory changes |
| CNS excitement | Auditory disturbance |
| CNS excitement | Buzzing in the ears |
| CNS excitement | Circumoral numbness |
| CNS excitement | Confusion |
| CNS excitement | Confusional state |
| CNS excitement | Diaphoresis |
| CNS excitement | Diplopia |
| CNS excitement | Dizziness |
| CNS excitement | Dysgeusia |
| CNS excitement | Dysphoria |
| CNS excitement | Excited |
| CNS excitement | Eye movement abnormality |
| CNS excitement | Facial spasm |
| CNS excitement | Flushing |
| CNS excitement | Frenzied |
| CNS excitement | Hallucinations |
| CNS excitement | Hearing impaired |
| CNS excitement | Intention tremor |
| CNS excitement | Lightheadedness |
| CNS excitement | Metallic/Metal taste |
| CNS excitement | Metallic/Metal smell |
| CNS excitement | Mouth/Tongue/Lip numbness/paresthesia/hypoesthesia |
| CNS excitement | Mydriasis |
| CNS excitement | Perioral numbness |
| CNS excitement | Perioral paresthesia |
| CNS excitement | Procedural dizziness |
| CNS excitement | Restlessness |
| CNS excitement | Ringing in the ears |
| CNS excitement | Tingling |
| CNS excitement | Tinnitus |
| CNS excitement | Tremor |
| CNS excitement | Vision blurred |
| CNS excitement | Visual disturbance |
| Seizure | Convulsion |
| Seizure | Generalised tonic-clonic seizure |
| Seizure | Grand mal convulsion |
| Seizure | Grand mal seizure |
| Seizure | Seizure |
| Seizure | Seizure like phenomena |
| Seizure | Seizures |
| Seizure | Shaking |
| Seizure | Tonic-clonic seizure |
| CNS depression | Abasia |
| CNS depression | Aphasia |
| CNS depression | Asthenia |
| CNS depression | Ataxia |
| CNS depression | Chills |
| CNS depression | Coma |
| CNS depression | Decreased level of consciousness |
| CNS depression | Depressed level of consciousness |
| CNS depression | Drowsiness |
| CNS depression | Dulled thinking |
| CNS depression | Dysarthria |
| CNS depression | Dystonia |
| CNS depression | Extrapyramidal disorder |
| CNS depression | Extrapyramidal symptoms |
| CNS depression | Extremity paresthesia |
| CNS depression | Feeling abnormal |
| CNS depression | Gait disturbance |
| CNS depression | Gait problems |
| CNS depression | Hypoaesthesia |
| CNS depression | Hypoesthesia |
| CNS depression | Hypotonia |
| CNS depression | Lethargy |
| CNS depression | Limb twitching |
| CNS depression | Loss of consciousness |
| CNS depression | Mental obtundation |
| CNS depression | Mental slowing |
| CNS depression | Mental status change |
| CNS depression | Mental status changes |
| CNS depression | Miosis |
| CNS depression | Muscle rigidity |
| CNS depression | Muscle spasm |
| CNS depression | Muscle twitching |
| CNS depression | Muscular weakness |
| CNS depression | Nausea |
| CNS depression | Numbness |
| CNS depression | Obtundation |
| CNS depression | Presyncope |
| CNS depression | Psychomotor hyperactivity |
| CNS depression | Reduced level of consciousness |
| CNS depression | Respiratory arrest |
| CNS depression | Slurred speech |
| CNS depression | Somnolence |
| CNS depression | Spasm |
| CNS depression | Speech disturbance |
| CNS depression | Syncope |
| CNS depression | Unconsciousness |
| CNS depression | Unease |
| CNS depression | Unresponsive to stimuli |
| CNS depression | Unresponsive to stimulus |
| CNS depression | Weight bearing difficulty |
| Cardiovascular excitement | Atrial fibrillation |
| Cardiovascular excitement | Bigeminy (extrasystoles) |
| Cardiovascular excitement | Blood pressure increased |
| Cardiovascular excitement | Extrasystole |
| Cardiovascular excitement | Extrasystoles |
| Cardiovascular excitement | Heart rate increased |
| Cardiovascular excitement | Hypertension |
| Cardiovascular excitement | Palpitations |
| Cardiovascular excitement | Supraventricular extrasystole |
| Cardiovascular excitement | Supraventricular extrasystoles |
| Cardiovascular excitement | Supraventricular tachycardia |
| Cardiovascular excitement | Tachyarrhythmia |
| Cardiovascular excitement | Tachycardia |
| Cardiovascular excitement | Tachydysrhythmia |
| Cardiovascular excitement | Ventricular ectopics |
| Cardiovascular excitement | Ventricular ectopy |
| Cardiovascular excitement | Ventricular tachycardia |
| Cardiovascular depression | Acidosis |
| Cardiovascular depression | Acute pulmonary edema |
| Cardiovascular depression | Acute pulmonary oedema |
| Cardiovascular depression | Apnea |
| Cardiovascular depression | Asystole |
| Cardiovascular depression | Atrioventricular block |
| Cardiovascular depression | Atrioventricular block complete |
| Cardiovascular depression | Atrioventricular block first degree |
| Cardiovascular depression | Blood pressure decreased |
| Cardiovascular depression | Bradyarrhythmia |
| Cardiovascular depression | Bradycardia |
| Cardiovascular depression | Bradycardia/asystole |
| Cardiovascular depression | Bundle branch block |
| Cardiovascular depression | Cardiac arrest |
| Cardiovascular depression | Cardiac failure |
| Cardiovascular depression | Cardiac failure congestive |
| Cardiovascular depression | Cardiopulmonary arrest |
| Cardiovascular depression | Cardio-respiratory arrest |
| Cardiovascular depression | Cardiovascular collapse |
| Cardiovascular depression | Cardiovascular depression |
| Cardiovascular depression | Conduction block |
| Cardiovascular depression | Congestive cardiac failure |
| Cardiovascular depression | Decreased contractility |
| Cardiovascular depression | Difficult breathing |
| Cardiovascular depression | Dyspnea |
| Cardiovascular depression | Difficulty breathing |
| Cardiovascular depression | Dyspnoea |
| Cardiovascular depression | Electrocardiogram PR prolongation |
| Cardiovascular depression | Electrocardiogram QRS complex prolonged |
| Cardiovascular depression | Electrocardiogram T wave inversion |
| Cardiovascular depression | Heart rate decreased |
| Cardiovascular depression | Hypercapnia |
| Cardiovascular depression | Hyperkalaemia |
| Cardiovascular depression | Hyperkalemia |
| Cardiovascular depression | Hypopnea |
| Cardiovascular depression | Hypopnoea |
| Cardiovascular depression | Hypotension |
| Cardiovascular depression | Hypoventilation |
| Cardiovascular depression | Hypoxia |
| Cardiovascular depression | Shallow breathing |
| Cardiovascular depression | Compromised breathing |
| Cardiovascular depression | Ischaemic stroke |
| Cardiovascular depression | Ischemia stroke |
| Cardiovascular depression | Myocardial depression |
| Cardiovascular depression | Myocardial infarction |
| Cardiovascular depression | Orthostatic hypotension |
| Cardiovascular depression | Peripheral ischaemia |
| Cardiovascular depression | Peripheral ischemia |
| Cardiovascular depression | Postural hypotension |
| Cardiovascular depression | Procedural hypotension |
| Cardiovascular depression | Prolonged PR interval |
| Cardiovascular depression | Prolonged QRS interval |
| Cardiovascular depression | Prolonged QT interval |
| Cardiovascular depression | Prolonged ST interval |
| Cardiovascular depression | Pulmonary edema |
| Cardiovascular depression | Pulmonary oedema |
| Cardiovascular depression | Pulse absent |
| Cardiovascular depression | Reduced contractility |
| Cardiovascular depression | Reduction in vascular tone |
| Cardiovascular depression | Respiratory depression |
| Cardiovascular depression | Respiratory distress |
| Cardiovascular depression | Respiratory failure |
| Cardiovascular depression | Shortness of breath |
| Cardiovascular depression | Stridor |
| Cardiovascular depression | Suppression of baroreceptor reflex |
| Cardiovascular depression | Ventricular arrhythmia |
| Cardiovascular depression | Wheezing |
| Cardiovascular excitement or cardiovascular depression | Anaesthetic complication cardiac |
| Cardiovascular excitement or cardiovascular depression | Anesthetic complication cardiac |
| Cardiovascular excitement or cardiovascular depression | Arrhythmia |
| Cardiovascular excitement or cardiovascular depression | Cardiac disorder |
| Cardiovascular excitement or cardiovascular depression | Cardiotoxicity |
| Cardiovascular excitement or cardiovascular depression | Changes in systemic vascular resistance |
| Cardiovascular excitement or cardiovascular depression | Chest pain |
| Cardiovascular excitement or cardiovascular depression | Dysrhythmias |
| Cardiovascular excitement or cardiovascular depression | Electrocardiogram abnormal |
| Cardiovascular excitement or cardiovascular depression | Electrocardiogram abnormality |
| Cardiovascular excitement or cardiovascular depression | ST changes |
| Cardiovascular excitement or cardiovascular depression | ST segment change |
| Cardiovascular excitement or cardiovascular depression | ST-segment changes |
| Cardiovascular excitement or cardiovascular depression | Wide complex |
| CNS excitement or cardiovascular depression | Facial sensorimotor abnormality |
| CNS excitement or cardiovascular depression | Neurotoxicity |
| CNS excitement or cardiovascular depression | Sensorimotor disorder |
| CNS excitement or cardiovascular depression | Sensory disturbance |
| Other | Anaphylactic reaction |
| Other | Anaphylactic shock |
| Other | Anaphylaxis |

**Abbreviations:** CNS, central nervous system

**Supplemental Table 2.** Narrative text from reports of patient death and probable or possible LAST

| **Narrative text extracted from a MAUDE database reporta** |
| --- |
| ON-Q* pump catheters placed due to chronic pain. Surgeon placed first ON-Q* pump catheter without complication. The surgeon requested an additional ON-Q* pump and, upon insertion, noticed the second catheter was longer than the first catheter and was a different model pump. The second model pump flow had a preset flow rate by the manufacturer. The second model pump flow rate was not reset. Additionally, the surgeon noticed that the anesthetic agent was leaking. The leaking catheter was removed, shortened, and reinserted. The surgery was completed, and the patient was transferred to the recovery area in stable condition. Approximately 6 h after completion of the procedure, the patient had a change in condition, which consisted of agitation, seizure, respiratory arrest, cardiac arrest, and death |
| Patient expired while using the ON-Q* pump. The pump has not been specifically implicated at this time. The pump was placed following mastectomy surgery. Patient was instructed on the care of the pump in morning and was to be released. Around 5 pm, the surgeon contacted the sales representative asking questions and informed the sales representative that the patient had bradycardia and had been resuscitated and placed on a ventilator. The pump was removed during resuscitation efforts, and the location of the pump is unknown. The sales rep was informed that the patient had been removed from mechanical ventilation and had died. |
| . aOriginal text has been edited for clarity. |

**Abbreviations:** LAST, local anesthetic systemic toxicity
